# Supplementary material for: Molecular characterization of mesenchymal stem cells in human osteoarthritis cartilage reveals contribution to the OA phenotype
Source: PubMed Central journal article supplement (PMC5935742; doi:10.1038/s41598-018-25395-8), 2018-05-04
Supplement: 41598_2018_25395_MOESM1_ESM.pdf [file 41598_2018_25395_MOESM1_ESM.pdf]

# SUPPLEMENTARY MATERIALS

Title:

Molecular characterization of mesenchymal stem cells in human osteoarthritis cartilage reveals contribution to the OA phenotype

Authors:

Chathuraka T. Jayasuriya (PHD)<sup>2</sup>, Nan Hu (MD)<sup>1,2</sup> Jing Li (PHD)<sup>1,2</sup>, Nicholas Lemme (BS)<sup>2</sup>, Richard Terek (MD)<sup>2</sup> Michael G. Ehrlich (MD)<sup>2</sup> and Qian Chen (PHD)<sup>1,2,\*</sup>.

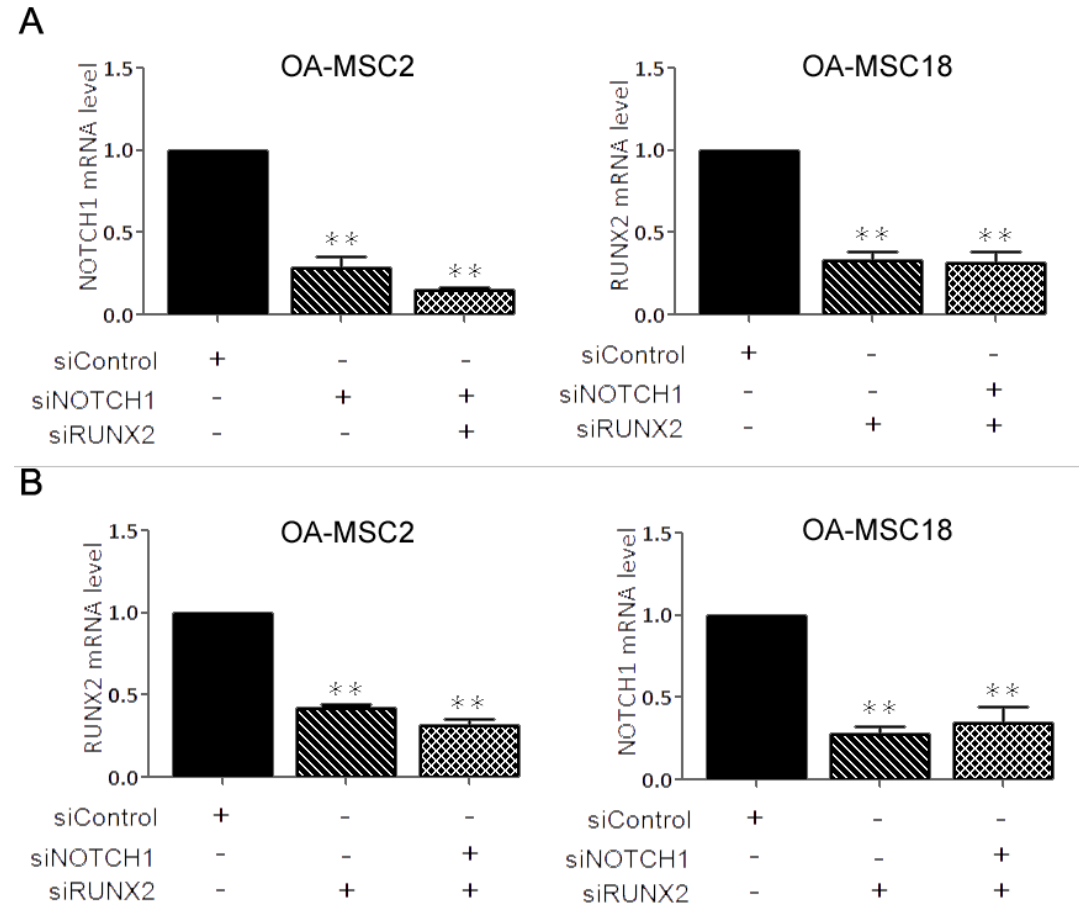

**Supplementary Figure 1. The knockdown efficiency of RUNX2 and NOTCH1 in OA-MSC2 and OA-MSC18.**  $n \geq 3$ . \*\*  $p \leq 0.01$ , relative to scrambled siRNA control transfected group. Data are represented as mean  $\pm$  SD.

## Supplementary Table. 1

| Line     | D3S1358 | D21S11   | D18S51     | Penta E | D5S818 | D13S317 | D7S820      | D16S539 | CSF1PO |
|----------|---------|----------|------------|---------|--------|---------|-------------|---------|--------|
| OA-MSC1  | 16      | 29       | 13, 21, 22 | 12      | 9, 11  | 9, 11   | 8, 10       | 11      | 10, 11 |
| OA-MSC2  | 16      | 29       | 13, 21     | 12      | 9, 11  | 9, 11   | 8, 10       | 11      | 10, 11 |
| OA-MSC5  | 16      | 29       | 13, 21     | 12      | 9, 11  | 9, 11   | 8, 10       | 11      | 10, 11 |
| OA-MSC6  | 16      | 29       | 13, 21     | 12      | 9, 11  | 9, 11   | 8, 10       | 11      | 10, 11 |
| OA-MSC8  | 16, 18  | 28, 32.2 | 19         | 10, 14  | 11     | 9, 12   | 8, 11, 11.1 | 10, 12  | 12, 13 |
| OA-MSC12 | 16      | 29       | 13, 21     | 12      | 9, 11  | 9, 11   | 8, 10       | 11      | 10, 11 |
| OA-MSC13 | 16, 18  | 28, 32.2 | 13, 21     | 10, 14  | 11     | 9, 12   | 8, 11, 11.1 | 10, 12  | 12, 13 |
| OA-MSC14 | 16, 18  | 28, 32.2 | 19         | 10, 14  | 11     | 9, 12   | 8, 11, 11.1 | 10, 12  | 12, 13 |
| OA-MSC18 | 16      | 29       | 13, 21     | 12      | 9, 11  | 9, 11   | 8, 10       | 11      | 10, 11 |

  

| Line     | Penta D | vWA    | D8S1179 | TPOX  | FGA    | AMEL |
|----------|---------|--------|---------|-------|--------|------|
| OA-MSC1  | 9, 11   | 14, 19 | 12, 14  | 8, 12 | 20, 21 | X    |
| OA-MSC2  | 9, 11   | 14, 19 | 12, 14  | 8, 12 | 20, 21 | X    |
| OA-MSC5  | 9, 11   | 14, 19 | 12, 14  | 8, 12 | 20, 21 | X    |
| OA-MSC6  | 9, 11   | 14, 19 | 12, 14  | 8, 12 | 20, 21 | X    |
| OA-MSC8  | 11, 12  | 17, 19 | 8, 14   | 8, 10 | 19, 21 | X, Y |
| OA-MSC12 | 9, 11   | 14, 19 | 12, 14  | 8, 12 | 20, 21 | X    |
| OA-MSC13 | 11, 12  | 17, 19 | 8, 14   | 8, 10 | 19, 21 | X, Y |
| OA-MSC14 | 11, 12  | 17, 19 | 8, 14   | 8, 10 | 19, 21 | X, Y |
| OA-MSC18 | 9, 11   | 14, 19 | 12, 14  | 8, 12 | 20, 21 | X    |

**Supplementary Table 1. Patient origin of each OA-MSC line.** Each cell line was profiled in order to determine their patient origin using autosomal short tandem repeat (STR) loci and the amelogenin locus. Profile results confirmed that cell lines 1, 2, 5, 6, 12 and 18 originated from an individual female patient. Cell lines 8, 13 and 14 originated from an individual male patient. OA-MSC1 appears to have an allele difference in D18S51 locus compared to the rest of the lines from the same patient. This difference is likely due to genetic instability common in transformed cells.

Supplementary Table. 2

| Human gene | RefSeq Accession | Forward Seq.                  | Reverse Seq.                    |
|------------|------------------|-------------------------------|---------------------------------|
| ACAN       | NM_001135.3      | 5'-ACCAGACGGGCCTCCCAGAC-3'    | 5'- ACAGCAGCCACACCAGGAAC-3'     |
| COL2A1     | NM_001844.4      | 5'-TGAGGGCGCGGTAGAGACCC-3'    | 5'-TGCACACAGCTGCCAGCCTC-3'      |
| CD49e      | NM_002205.4      | 5'-GGCTTCAACTTAGACGCGGA-3'    | 5'- ATTCAATGGGGGTGCACTGT-3'     |
| SOX9       | NM_000346.3      | 5'-GGACCAGTACCCGCACTTGCA-3'   | 5'- GTTCTTCACCGACTTCCTCCGCCG-3' |
| MATN3      | NM_002381.4      | 5'-TGAGGGCTACACTCTGAATGC-3'   | 5'-GTGCTTCCTCAGTGGCTGAA-3'      |
| PRG4       | NM_001127708.2   | 5'-TTCATCTCAAGAGCTTTCTGT-3'   | 5'-TGATGGTTTGAGATGCTCCTG-3'     |
| PRX1       | NM_006902.4      | 5'-CATCGTACCTCGTCCTGCTC-3'    | 5'-GTAAACAACATCTTGGGAGGGA-3'    |
| LPL        | NM_000237.2      | 5'-GACACTTGCCACCTCATTCC-3'    | 5'-AGCCATGGATCACCATGAAGG-3'     |
| COL1A1     | NM_000088.3      | 5'-CAGGAGGCACGCGGAGTGTG-3'    | 5'-GGCAGGGCTCGGGTTTCCAC-3'      |
| ALPL       | NM_000478.5      | 5'-CTGGACGGACCCTCGCCAGTG-3'   | 5'- TGCAATCGACGTGGGTGGGAGG-3'   |
| RUNX2      | NM_001015051.3   | 5'-GGCTGCAAGCAGTATTTACAACA-3' | 5'-CGGATCCCAAAGAAGTTTTGCT-3'    |
| IHH        | NM_002181.3      | 5'-GGAGAACACAGGCGCCGACC-3'    | 5'-CGGTCACCCGCAGCTTCACA-3'      |
| HHIP       | NM_022475.2      | 5'-CCCCAACCCTGACTG-3'         | 5'-CGGGGCTGTAGGGCACTCC-3'       |
| COL10A1    | NM_000493.3      | 5'-GCCACAGGCATAAAAGGCC-3'     | 5'-GAAGGACCTGGGTGCCCTCGA-3'     |
| NOTCH1     | NM_017617.4      | 5'-CTCCTACCGCTGCGTCTG-3'      | 5'-GGCAGGCAGGCACACT-3'          |
| MMP-13     | NM_002427.3      | 5'-ATGCGGGTTCCTGATGTGG-3'     | 5'-GGCCCAGGAGGAAAAGCATG-3'      |
| ADAMTS5    | NM_007038.4      | 5'-GGCCGTGGTGAAGGTGGTGG-3'    | 5'-GCTGCGTGGAGGCCATCGTC-3'      |

**Supplementary Table 2. Forward and reverse sequences of primers used to conduct Real-time RT-PCR for gene mRNA expression analysis.**
